# Supplementary material
Source: PubMed Central journal article supplement (PMC2614775)
Supplement: 0807743105_0807743105SI.pdf [file 0807743105_0807743105SI.pdf]

# Supporting Information

Le Saout *et al.* 10.1073/pnas.0807743105

## SI Methods

**In Vitro Activation of TCR Transgenic T Cells.** Purified Clone 4 CD8<sup>+</sup> were seeded in 24 well plates,  $2 \times 10^6$  per well, in RPMI medium 1640 with GlutaMAX-I media (Invitrogen) containing 10% FCS,  $5 \times 10^{-5}$  M  $\beta$ -mercaptoethanol and 1% penicillin streptomycin (Invitrogen) (complete media). For priming, LPS blasts, prepared by incubation of BALB/c spleen cells in complete media containing 7  $\mu$ g/mL dextran sulfate (Sigma) and 25  $\mu$ g/mL LPS (Sigma) for 3 days, were used as APC. Cells were irradiated (3,000 rads) and pulsed for 1 h at 37 °C with 5  $\mu$ g/mL of K<sup>d</sup> HA (518–526) peptide (GL Biochem) in complete media. After washing,  $2 \times 10^6$  cells per well were added to the T cell cultures. Cultures were maintained at 37 °C for 4 days and viable cells were then isolated by Ficoll-Paque separation.

**Flow Cytometry.** Seven, 10, or 13 days after adoptive transfer, the pancreas, spleen, pancreatic lymph nodes (pLN), and a mixture of inguinal, axillary, cervical, mandibular, popliteal, and mesenteric LN were excised and processed separately to obtain single cell suspensions by mechanic disruption on Nitex filters in PBS containing 5% FCS at 4 °C. After counting, all pLN cells and an equivalent number of cells from other LN and spleen were stained with the indicated Abs. Pancreatic LNs from 3 mice receiving the same treatment were generally pooled together for staining. For the pancreas, suspensions were subject to Histopaque separation and all cells obtained from a single pancreas were stained.

All mAbs and secondary reagents were purchased from BD PharMingen except anti-CD44-APC-Alexa Fluor 750 mAb (eBioscience). Donor Clone 4 and HNT T cells were detected and enumerated by virtue of their Thy1.1 expression. Lymphocytes were incubated with anti-CD8 $\alpha$ -PerCP and anti-Thy1.1-PE

mAbs in PBS containing 2% FCS and 0.02% sodium azide for 30 min at 4 °C. After washing, cells were analyzed with a FACSCanto II apparatus by using Diva software (BDB);  $2 \times 10^6$  events were collected for each analysis.

For Clone 4 CD8<sup>+</sup> T cells, the intensity of CFSE fluorescence was analyzed in the CD8<sup>+</sup> Thy1.1<sup>+</sup> subpopulation of lymphocytes. For HNT cells, this was performed by gating on CD8<sup>-</sup> Thy1.1<sup>+</sup> or CD4<sup>+</sup> Thy1.1<sup>+</sup> T cells depending on the experiment. To assess the phenotype of proliferating T cells, they were also stained with anti-CD25-PE-Cy7, anti-CD62L-APC and anti-CD44-APC-Alexa Fluor 750 mAbs.

To assess production of IFN- $\gamma$  in response to antigen by Clone 4 CD8<sup>+</sup> T cells, LN cells or splenocytes were incubated in complete media with 1  $\mu$ g/mL of the K<sup>d</sup> HA peptide and 10  $\mu$ g/mL of brefeldin A (Sigma) for 5 h at 37 °C. Cells that did not receive peptide were used as a negative control. After washing, cells were stained to detect cell surface CD8 and Thy1.1 as described above. Cells were then permeabilized and stained to detect intracellular IFN- $\gamma$  with an anti-IFN- $\gamma$ -APC mAb using the Cytotfix/Cytoperm kit (BD PharMingen) according to the manufacturer's instructions. To assess cytokine production by HNT CD4<sup>+</sup> T cells, lymphocytes from different lymphoid organs were incubated with equal numbers of A<sup>d</sup> HA peptide-pulsed BALB/c spleen cells in complete media in the presence of 10  $\mu$ g/mL of brefeldin A for 5 h at 37 °C. Cells were then washed, stained to detect CD4 and Thy1.1, and fixed and permeabilized by using the Cytotfix/Cytoperm kit (BD PharMingen). Intracellular cytokine staining was performed using either an anti-IFN- $\gamma$ -APC mAb or an anti-IL-2-APC mAb.

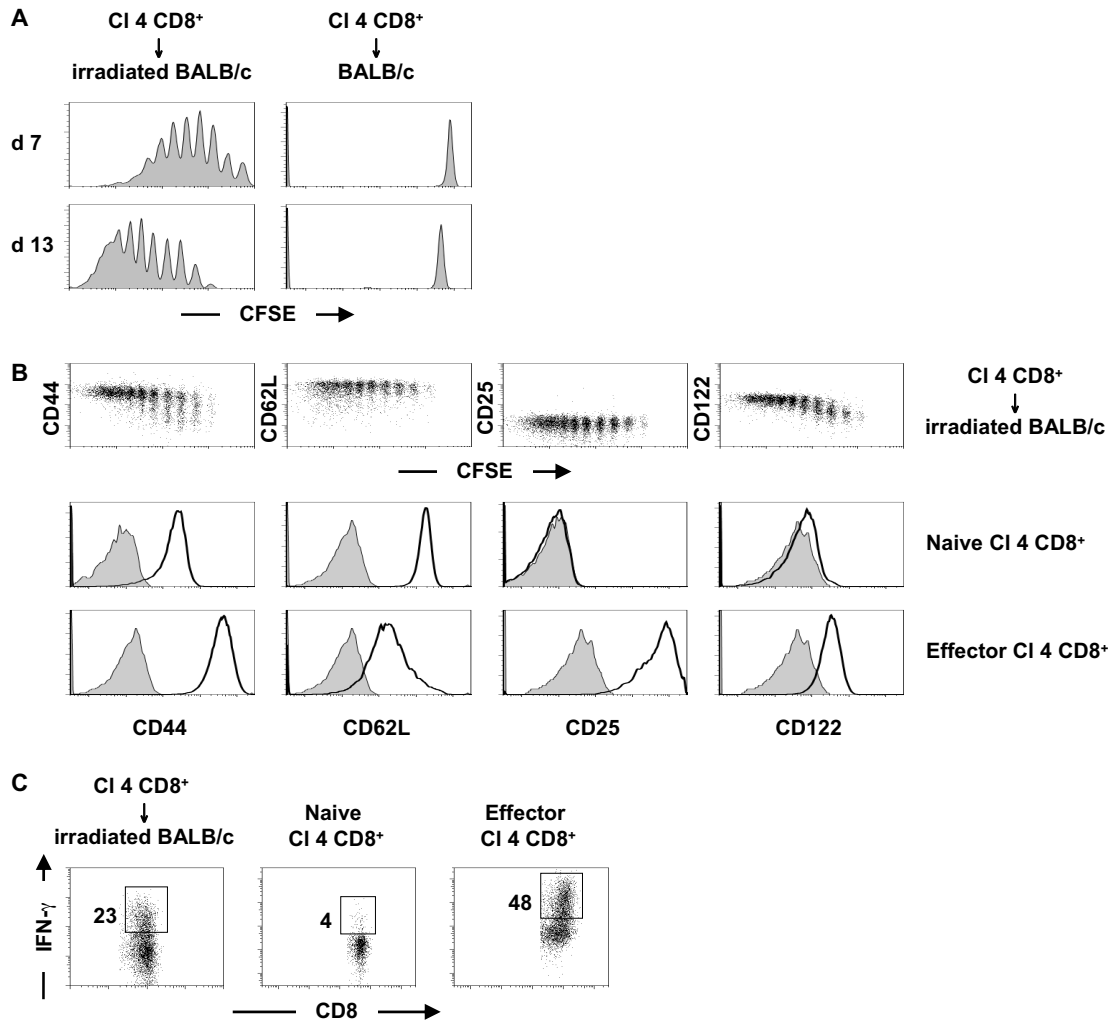

**Fig. 51.** Naive Clone 4 CD8<sup>+</sup> T cells proliferate and differentiate into memory-like T cells under lymphopenic conditions. (A) Irradiated and nonirradiated BALB/c mice were injected with  $5 \times 10^6$  CFSE-labeled naive Clone 4 Thy1.1<sup>+</sup> CD8<sup>+</sup> T cells (CI 4 CD8<sup>+</sup>). Mice were killed at days 7 or 13 after transfer and splenocytes were analyzed by FACS. Histograms represent CFSE labeling on gated CD8<sup>+</sup> Thy1.1<sup>+</sup> lymphocytes. (B) CD8<sup>+</sup> Thy1.1<sup>+</sup> splenocytes from irradiated BALB/c mice were assessed for expression of the CD44, CD62L, CD25, and CD122 markers as a function of CFSE fluorescence at day 13. The phenotype of the naive Clone 4 CD8<sup>+</sup> cells before transfer as compared with in vitro activated (see *SI Methods*) Clone 4 CD8<sup>+</sup> T cell effectors are shown. Activation markers are presented as open histograms while isotype controls are shaded. (C) On day 13 after transfer, splenocytes from animals described in B were incubated with K<sup>d</sup> HA peptide for 5 h at 37 °C and analyzed by FACS to detect IFN-γ production. Background in nonstimulated controls was <1%. Controls included naive and effector Clone 4 cells as indicated. The percentages of Clone 4 CD8<sup>+</sup> T cells producing IFN-γ are indicated. Data from one representative experiment of 3 are presented.

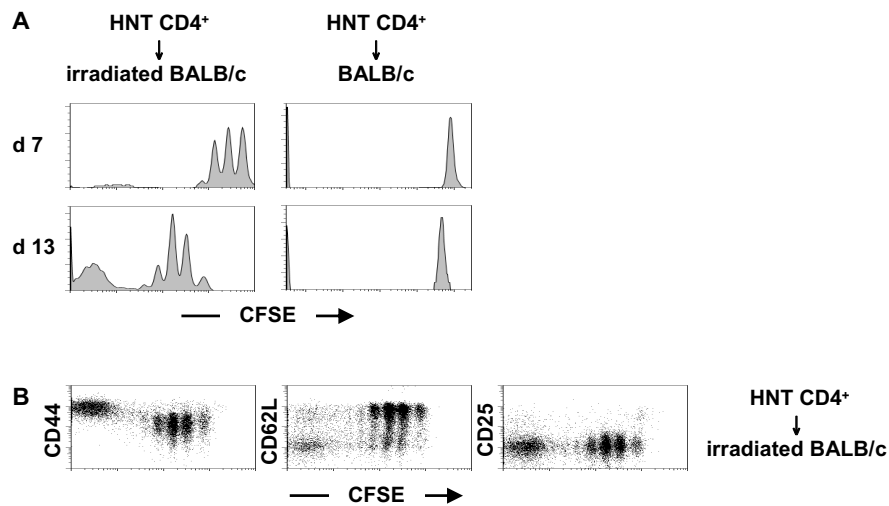

**Fig. S2.** Proliferation of HNT CD4<sup>+</sup> T cells in BALB/c mice. (A) Irradiated and nonirradiated BALB/c mice were injected with  $5 \times 10^6$  purified CFSE-labeled HNT Thy1.1<sup>+</sup> CD4<sup>+</sup> T cells (HNT CD4<sup>+</sup>) as described in *Materials and Methods*. Mice were killed at days 7 or 13 after transfer and splenocytes were analyzed by FACS. Histograms show CFSE labeling on gated CD4<sup>+</sup> Thy1.1<sup>+</sup> lymphocytes. (B) CD4<sup>+</sup> Thy1.1<sup>+</sup> splenocytes from irradiated BALB/c mice were assessed for expression of the CD44, CD62L, and CD25 markers as a function of CFSE fluorescence at day 13. Data from 1 representative experiment of 3 are presented. In preliminary experiments, naive HNT CD4<sup>+</sup> T cells were further purified by positive magnetic selection of CD62L<sup>hi</sup> cells by using StemCell Tech. reagents (>98% purity), because their proliferation profiles and phenotype (data not shown) on injection into irradiated recipients were very similar to those obtained by using purified total CD4<sup>+</sup> T cells, those displayed in this figure, we used total CD4<sup>+</sup> T cells routinely throughout this study. Proliferating HNT cells contained a subpopulation of CD25<sup>+</sup> cells (3–4% of donor cells, as shown in B) that corresponds to Foxp3<sup>+</sup> Tregs (data not shown). They were most likely the progeny of the CD25<sup>+</sup> Foxp3<sup>+</sup> subpopulation present in the original inoculum.
